# Supplementary material for: Gene-Wide Analysis Detects Two New Susceptibility Genes for Alzheimer's Disease
Source: PLoS One. 2014 Jun 12;9(6):e94661. doi: 10.1371/journal.pone.0094661 (PMC4055488; doi:10.1371/journal.pone.0094661)
Supplement: Table S3 — Detailed SNP information for TP53INP1 gene. (XLS) [file pone.0094661.s003.xls]

## Sheet: SupplTable3
Table S3. Detailed SNP information for TP53INP1 gene.
GENE	chr	pos	SNP	Allele1	Allele2	OR Stage1	P.value Stage1	OR Stage2	P.value Stage2	OR comb	P.value comb
within10kbTP53INP1	8	95929068	rs13282419	t	c	1.02398	0.1423	NA	NA	NA	0.1423
within10kbTP53INP1	8	95929202	rs12548367	t	c	1.02327	0.1559	NA	NA	NA	0.1559
within10kbTP53INP1	8	95929256	8-95929256	t	c	0.986788	0.8458	NA	NA	NA	0.8458
within10kbTP53INP1	8	95929296	rs12541035	a	g	0.974627	0.1186	NA	NA	NA	0.1186
within10kbTP53INP1	8	95929411	rs550418	t	c	1.0017	0.9203	NA	NA	NA	0.9203
within10kbTP53INP1	8	95929843	rs12548999	t	c	1.02603	0.112	NA	NA	NA	0.112
within10kbTP53INP1	8	95930301	rs10956931	t	c	0.976676	0.164	NA	NA	NA	0.164
within10kbTP53INP1	8	95930489	rs2467671	a	g	0.916677	0.006222	NA	NA	NA	0.006222
within10kbTP53INP1	8	95930901	rs684303	a	g	1.0921	0.005728	NA	NA	NA	0.005728
within10kbTP53INP1	8	95931344	8-95931344	t	c	0.988764	0.8426	NA	NA	NA	0.8426
within10kbTP53INP1	8	95931782	rs2123647	a	g	1.02276	0.1652	NA	NA	NA	0.1652
within10kbTP53INP1	8	95932833	8-95932833	a	g	0.986788	0.8451	NA	NA	NA	0.8451
within10kbTP53INP1	8	95933075	8-95933075	t	g	0.986887	0.8467	NA	NA	NA	0.8467
within10kbTP53INP1	8	95933134	8-95933134	a	g	0.953134	0.4321	NA	NA	NA	0.4321
within10kbTP53INP1	8	95934108	rs2515235	a	g	0.965412	0.1051	NA	NA	NA	0.1051
within10kbTP53INP1	8	95934518	8-95934518	a	g	1.03676	0.5796	NA	NA	NA	0.5796
within10kbTP53INP1	8	95934522	8-95934522	a	g	1.03666	0.5803	NA	NA	NA	0.5803
within10kbTP53INP1	8	95934675	8-95934675	t	c	1.01248	0.8562	NA	NA	NA	0.8562
within10kbTP53INP1	8	95934811	rs2467672	a	g	0.965219	0.1031	NA	NA	NA	0.1031
within10kbTP53INP1	8	95934851	rs2467673	t	c	0.956093	0.0497	NA	NA	NA	0.0497
within10kbTP53INP1	8	95934907	rs2515236	a	g	1.03303	0.04476	NA	NA	NA	0.04476
within10kbTP53INP1	8	95935080	8-95935080	t	c	0.881086	0.06965	NA	NA	NA	0.06965
within10kbTP53INP1	8	95935102	rs2467674	a	g	1.03552	0.1088	NA	NA	NA	0.1088
within10kbTP53INP1	8	95935112	8-95935112	t	c	0.951896	0.421	NA	NA	NA	0.421
within10kbTP53INP1	8	95935164	rs12548874	a	c	1.04404	0.005826	NA	NA	NA	0.005826
within10kbTP53INP1	8	95936033	rs2459963	a	g	0.970251	0.159	NA	NA	NA	0.159
within10kbTP53INP1	8	95936364	8-95936364	c	g	0.951515	0.4177	NA	NA	NA	0.4177
within10kbTP53INP1	8	95936375	rs2459964	a	g	1.03479	0.1157	NA	NA	NA	0.1157
within10kbTP53INP1	8	95936413	rs2515237	a	t	1.03531	0.1109	NA	NA	NA	0.1109
within10kbTP53INP1	8	95937065	8-95937065	t	g	1.05117	0.4156	NA	NA	NA	0.4156
within10kbTP53INP1	8	95937152	rs1971212	a	g	1.03583	0.1046	NA	NA	NA	0.1046
within10kbTP53INP1	8	95937269	rs59980877	a	c	0.992528	0.9446	NA	NA	NA	0.9446
within10kbTP53INP1	8	95937502	rs7845219	t	c	0.952657	0.002399	NA	NA	NA	0.002399
within10kbTP53INP1	8	95937940	rs2467675	a	g	0.958582	0.09297	NA	NA	NA	0.09297
within10kbTP53INP1	8	95938057	rs2013995	t	c	0.972486	0.2147	NA	NA	NA	0.2147
TP53INP1	8	95938422	rs7760	a	c	1.05201	0.0357	NA	NA	NA	0.0357
TP53INP1	8	95939594	rs2945554	a	c	1.02398	0.144	NA	NA	NA	0.144
TP53INP1	8	95939946	8-95939946	a	g	0.919523	0.3619	NA	NA	NA	0.3619
TP53INP1	8	95940598	rs2904889	t	g	1.04592	0.03155	NA	NA	NA	0.03155
TP53INP1	8	95940800	rs2459965	a	g	0.964062	0.09206	NA	NA	NA	0.09206
TP53INP1	8	95942050	8-95942050	a	c	0.990446	0.8887	NA	NA	NA	0.8887
TP53INP1	8	95942244	rs896849	a	g	1.0349	0.113	NA	NA	NA	0.113
TP53INP1	8	95943174	8-95943174	t	c	1.04467	0.4673	NA	NA	NA	0.4673
TP53INP1	8	95944636	rs2253173	a	t	0.961558	0.07793	NA	NA	NA	0.07793
TP53INP1	8	95945487	rs11779282	a	g	1.05012	0.01872	NA	NA	NA	0.01872
TP53INP1	8	95945892	rs1017634	c	g	0.965123	0.1038	NA	NA	NA	0.1038
TP53INP1	8	95946135	rs36118131	a	c	1.03956	0.07772	NA	NA	NA	0.07772
TP53INP1	8	95946263	rs34169370	a	c	0.953134	0.03821	NA	NA	NA	0.03821
TP53INP1	8	95947281	8-95947281	t	c	1.03438	0.5887	NA	NA	NA	0.5887
TP53INP1	8	95947638	8-95947638	t	c	1.04624	0.4564	NA	NA	NA	0.4564
TP53INP1	8	95948202	rs10956932	a	g	0.977067	0.1516	NA	NA	NA	0.1516
TP53INP1	8	95948488	8-95948488	t	c	0.980199	0.7723	NA	NA	NA	0.7723
TP53INP1	8	95948871	8-95948871	a	c	1.01096	0.9048	NA	NA	NA	0.9048
TP53INP1	8	95948907	8-95948907	c	g	0.957911	0.4787	NA	NA	NA	0.4787
TP53INP1	8	95949013	rs3019175	a	g	1.02419	0.1507	NA	NA	NA	0.1507
TP53INP1	8	95949433	8-95949433	t	g	1.04373	0.4817	NA	NA	NA	0.4817
TP53INP1	8	95950251	rs896851	t	c	0.97531	0.1455	NA	NA	NA	0.1455
TP53INP1	8	95950403	rs896850	c	g	0.971514	0.08319	NA	NA	NA	0.08319
TP53INP1	8	95951073	rs1011795	a	g	1.02922	0.08235	NA	NA	NA	0.08235
TP53INP1	8	95951273	rs1011796	t	c	1.02644	0.1268	NA	NA	NA	0.1268
TP53INP1	8	95951807	rs2013597	a	g	1.02922	0.08195	NA	NA	NA	0.08195
TP53INP1	8	95952441	8-95952441	a	g	1.04477	0.4725	NA	NA	NA	0.4725
TP53INP1	8	95952477	rs2956210	a	g	0.968603	0.05815	NA	NA	NA	0.05815
TP53INP1	8	95952621	rs2904893	a	c	0.9687	0.05927	NA	NA	NA	0.05927
TP53INP1	8	95952975	8-95952975	t	c	0.958103	0.483	NA	NA	NA	0.483
TP53INP1	8	95953660	8-95953660	a	g	0.958199	0.4841	NA	NA	NA	0.4841
TP53INP1	8	95955074	rs4735333	A	G	1.05601	0.0004454	1.09977	2.994e-05	1.06962	1.503e-07
TP53INP1	8	95955292	rs4735334	a	g	1.03252	0.05668	NA	NA	NA	0.05668
TP53INP1	8	95955562	rs4734293	a	t	0.959637	0.02297	NA	NA	NA	0.02297
TP53INP1	8	95955701	rs10112447	t	c	1.02973	0.07635	NA	NA	NA	0.07635
TP53INP1	8	95955745	rs11784717	t	c	0.967539	0.05041	NA	NA	NA	0.05041
TP53INP1	8	95957063	rs9643353	t	c	1.02614	0.1313	NA	NA	NA	0.1313
TP53INP1	8	95957984	rs11786613	a	c	0.971222	0.6714	NA	NA	NA	0.6714
TP53INP1	8	95958637	rs1713669	G	C	0.945445	0.0004104	0.915944	0.0001787	0.936037	4.971e-07
TP53INP1	8	95959808	rs896855	G	A	1.05369	0.0008395	1.10153	3.206e-05	1.06844	3.514e-07
TP53INP1	8	95960511	rs896854	t	c	0.955424	0.004156	NA	NA	NA	0.004156
TP53INP1	8	95960767	rs1320164	a	g	1.05064	0.001677	NA	NA	NA	0.001677
TP53INP1	8	95960855	rs896853	c	g	1.05496	0.0006453	NA	NA	NA	0.0006453
TP53INP1	8	95960886	rs896852	t	g	1.05517	0.0005233	NA	NA	NA	0.0005233
TP53INP1	8	95960947	rs2879813	a	g	0.948285	0.0006516	NA	NA	NA	0.0006516
within10kbTP53INP1	8	95961626	rs10097617	T	C	0.947906	0.0006362	0.907738	0.0001871	0.936974	1.201e-06
within10kbTP53INP1	8	95961794	rs10108430	C	T	0.948759	0.0007016	0.909191	2.955e-05	0.936037	2.562e-07
within10kbTP53INP1	8	95961979	rs7003387	C	G	0.947432	0.0004901	0.9132	7.04e-05	0.936505	3.118e-07
within10kbTP53INP1	8	95962249	rs62523082	t	c	1.04697	0.9033	NA	NA	NA	0.9033
within10kbTP53INP1	8	95962676	8-95962676	t	c	0.726803	0.1401	NA	NA	NA	0.1401
within10kbTP53INP1	8	95963141	8-95963141	t	c	0.930252	0.2713	NA	NA	NA	0.2713
within10kbTP53INP1	8	95963417	8-95963417	a	g	1.00421	0.9188	NA	NA	NA	0.9188
within10kbTP53INP1	8	95963798	rs527234	G	C	0.947053	0.0005944	0.936037	0.009489	0.943933	1.82e-05
within10kbTP53INP1	8	95964004	rs524678	t	c	0.989357	0.7313	NA	NA	NA	0.7313
within10kbTP53INP1	8	95964101	8-95964101	t	g	1.04833	0.4437	NA	NA	NA	0.4437
within10kbTP53INP1	8	95964548	rs36081636	a	g	0.910374	0.1534	NA	NA	NA	0.1534
within10kbTP53INP1	8	95965082	rs494297	t	c	1.00934	0.7668	NA	NA	NA	0.7668
within10kbTP53INP1	8	95965135	rs493506	t	g	1.01177	0.7162	NA	NA	NA	0.7162
within10kbTP53INP1	8	95965162	8-95965162	a	g	1.04875	0.4408	NA	NA	NA	0.4408
within10kbTP53INP1	8	95965685	rs13255935	C	A	0.947337	0.0004835	0.913657	7.568e-05	0.936599	3.214e-07
within10kbTP53INP1	8	95965695	rs13257021	A	G	0.945634	0.0003154	0.91247	6.241e-05	0.935008	1.703e-07
within10kbTP53INP1	8	95965717	8-95965717	c	g	1.04907	0.4383	NA	NA	NA	0.4383
within10kbTP53INP1	8	95965743	rs2515226	A	G	0.947527	0.0006503	0.915761	0.0001742	0.937442	8.389e-07
within10kbTP53INP1	8	95965940	8-95965940	t	c	1.04666	0.6071	NA	NA	NA	0.6071
within10kbTP53INP1	8	95966286	rs572547	a	g	1.05285	0.001316	NA	NA	NA	0.001316
within10kbTP53INP1	8	95966531	rs6987752	t	c	1.05548	0.0004907	NA	NA	NA	0.0004907
within10kbTP53INP1	8	95967156	rs509594	G	C	0.947622	0.0006809	0.916219	0.0001913	0.937724	9.455e-07
within10kbTP53INP1	8	95967372	rs10808671	A	G	0.94535	0.0003147	0.912926	6.901e-05	0.934915	1.798e-07
within10kbTP53INP1	8	95967688	rs10956933	c	g	0.945539	0.0003034	NA	NA	NA	0.0003034
within10kbTP53INP1	8	95967838	rs481887	G	A	0.947243	0.0005738	0.915486	0.0001682	0.937255	7.185e-07
within10kbTP53INP1	8	95968413	rs726816	T	G	0.942613	0.0001486	0.917411	0.0001655	0.934541	1.474e-07
within10kbTP53INP1	8	95969257	rs4582532	a	g	1.05792	0.000272	NA	NA	NA	0.000272
within10kbTP53INP1	8	95969261	rs2340586	a	g	1.05792	0.0002717	NA	NA	NA	0.0002717
within10kbTP53INP1	8	95969322	rs10429294	t	c	1.06428	5.761e-05	NA	NA	NA	5.761e-05
within10kbTP53INP1	8	95969445	rs9297949	A	C	0.939977	6.874e-05	0.921548	0.0003444	0.934074	1.126e-07
within10kbTP53INP1	8	95969947	rs1453377	t	c	1.06481	4.966e-05	NA	NA	NA	4.966e-05
within10kbTP53INP1	8	95970184	rs1453378	t	g	0.95361	0.4462	NA	NA	NA	0.4462
within10kbTP53INP1	8	95970233	8-95970233	t	c	1.0405	0.5134	NA	NA	NA	0.5134
within10kbTP53INP1	8	95970239	rs1453379	t	c	0.96127	0.0186	NA	NA	NA	0.0186
within10kbTP53INP1	8	95970436	8-95970436	t	g	0.675974	0.5448	NA	NA	NA	0.5448
within10kbTP53INP1	8	95970484	8-95970484	t	c	0.955042	0.02624	NA	NA	NA	0.02624
within10kbTP53INP1	8	95970801	8-95970801	t	c	1.47935	0.5448	NA	NA	NA	0.5448
within10kbTP53INP1	8	95970802	8-95970802	a	g	0.954946	0.02542	NA	NA	NA	0.02542
within10kbTP53INP1	8	95971164	rs10429443	A	G	0.939789	5.941e-05	0.921364	0.0003301	0.933887	9.38e-08
within10kbTP53INP1	8	95971281	8-95971281	a	g	1.03686	0.651	NA	NA	NA	0.651
