# Supplementary material for: Gene-Wide Analysis Detects Two New Susceptibility Genes for Alzheimer's Disease
Source: PLoS One. 2014 Jun 12;9(6):e94661. doi: 10.1371/journal.pone.0094661 (PMC4055488; doi:10.1371/journal.pone.0094661)
Supplement: Table S4 — Detailed SNP information for IGHV1-67 gene. (XLS) [file pone.0094661.s004.xls]

## Sheet: SupplTable4
Table S4. Detailed SNP information for IGHV1-67 gene.
GENE	chr	pos	SNP	Allele1	Allele2	OR Stage1	P.value Stage1	OR Stage2	P.value Stage2	OR comb	P.value comb
within10KBIGHV1-67	14	107126627	rs8015406	a	g	1.03759	0.1238	NA	NA	NA	0.1238
within10KBIGHV1-67	14	107126781	rs11850600	a	g	1.1076	0.001851	NA	NA	NA	0.001851
within10KBIGHV1-67	14	107126860	rs11850709	a	g	0.900144	0.00146	NA	NA	NA	0.00146
within10KBIGHV1-67	14	107126938	14-107126938	a	g	1.03138	0.8165	NA	NA	NA	0.8165
within10KBIGHV1-67	14	107127877	rs7159297	a	g	1.00995	0.6305	NA	NA	NA	0.6305
within10KBIGHV1-67	14	107128100	rs59684382	a	t	1.08047	0.5579	NA	NA	NA	0.5579
within10KBIGHV1-67	14	107128509	14-107128509	t	c	0.754877	0.09426	NA	NA	NA	0.09426
within10KBIGHV1-67	14	107128559	14-107128559	t	c	1.12187	0.4382	NA	NA	NA	0.4382
within10KBIGHV1-67	14	107128564	rs10220646	t	c	1.01308	0.558	NA	NA	NA	0.558
within10KBIGHV1-67	14	107128596	14-107128596	a	g	0.900054	0.3661	NA	NA	NA	0.3661
within10KBIGHV1-67	14	107128638	14-107128638	a	g	0.945445	0.7577	NA	NA	NA	0.7577
within10KBIGHV1-67	14	107128647	14-107128647	t	c	0.816605	0.5683	NA	NA	NA	0.5683
within10KBIGHV1-67	14	107128661	14-107128661	a	g	1.23467	0.09063	NA	NA	NA	0.09063
within10KBIGHV1-67	14	107128812	14-107128812	a	g	1.0431	0.7736	NA	NA	NA	0.7736
within10KBIGHV1-67	14	107128847	14-107128847	t	g	0.955806	0.7429	NA	NA	NA	0.7429
within10KBIGHV1-67	14	107128887	14-107128887	c	g	1.18756	0.2749	NA	NA	NA	0.2749
within10KBIGHV1-67	14	107128912	14-107128912	t	c	0.856244	0.5199	NA	NA	NA	0.5199
within10KBIGHV1-67	14	107128929	14-107128929	a	c	1.34299	0.3846	NA	NA	NA	0.3846
within10KBIGHV1-67	14	107128937	14-107128937	t	g	1.43735	0.1859	NA	NA	NA	0.1859
within10KBIGHV1-67	14	107128961	14-107128961	t	c	0.938474	0.7665	NA	NA	NA	0.7665
within10KBIGHV1-67	14	107128972	14-107128972	t	c	0.857701	0.4967	NA	NA	NA	0.4967
within10KBIGHV1-67	14	107129019	14-107129019	t	c	1.0203	0.9097	NA	NA	NA	0.9097
within10KBIGHV1-67	14	107129051	14-107129051	t	c	0.650249	0.229	NA	NA	NA	0.229
within10KBIGHV1-67	14	107129106	14-107129106	a	c	0.956284	0.8501	NA	NA	NA	0.8501
within10KBIGHV1-67	14	107129118	14-107129118	t	c	0.933607	0.7709	NA	NA	NA	0.7709
within10KBIGHV1-67	14	107129187	rs7156660	t	c	0.97492	0.3206	NA	NA	NA	0.3206
within10KBIGHV1-67	14	107129280	14-107129280	a	t	0.727967	0.4753	NA	NA	NA	0.4753
within10KBIGHV1-67	14	107129365	rs59747228	a	g	0.546675	0.2407	NA	NA	NA	0.2407
within10KBIGHV1-67	14	107129367	rs58177535	t	c	0.546675	0.2407	NA	NA	NA	0.2407
within10KBIGHV1-67	14	107129458	rs7161497	t	c	1.02409	0.2721	NA	NA	NA	0.2721
within10KBIGHV1-67	14	107129506	14-107129506	a	g	1.4881	0.007195	NA	NA	NA	0.007195
within10KBIGHV1-67	14	107129530	14-107129530	t	c	1.30539	0.1002	NA	NA	NA	0.1002
within10KBIGHV1-67	14	107129547	14-107129547	t	c	0.766439	0.1037	NA	NA	NA	0.1037
within10KBIGHV1-67	14	107129557	14-107129557	a	g	1.33056	0.09047	NA	NA	NA	0.09047
within10KBIGHV1-67	14	107129606	14-107129606	a	g	3.69951	0.04047	NA	NA	NA	0.04047
within10KBIGHV1-67	14	107129608	14-107129608	a	g	3.69951	0.04047	NA	NA	NA	0.04047
within10KBIGHV1-67	14	107129789	14-107129789	a	g	0.812532	0.04534	NA	NA	NA	0.04534
within10KBIGHV1-67	14	107129907	rs11624912	a	g	1.01471	0.5152	NA	NA	NA	0.5152
within10KBIGHV1-67	14	107129956	14-107129956	t	c	0.318542	0.06526	NA	NA	NA	0.06526
within10KBIGHV1-67	14	107130243	14-107130243	a	t	5.00581	0.0721	NA	NA	NA	0.0721
within10KBIGHV1-67	14	107130299	14-107130299	a	g	1.086	0.8574	NA	NA	NA	0.8574
within10KBIGHV1-67	14	107130321	14-107130321	c	g	0.581468	0.4166	NA	NA	NA	0.4166
within10KBIGHV1-67	14	107130383	14-107130383	t	c	1.27074	0.2559	NA	NA	NA	0.2559
within10KBIGHV1-67	14	107130439	14-107130439	a	g	0.890921	0.4772	NA	NA	NA	0.4772
within10KBIGHV1-67	14	107130481	14-107130481	c	g	1.1034	0.6341	NA	NA	NA	0.6341
within10KBIGHV1-67	14	107130504	14-107130504	t	g	1.01776	0.9444	NA	NA	NA	0.9444
within10KBIGHV1-67	14	107130505	14-107130505	c	g	0.969863	0.9008	NA	NA	NA	0.9008
within10KBIGHV1-67	14	107130553	14-107130553	t	c	1.06865	0.6598	NA	NA	NA	0.6598
within10KBIGHV1-67	14	107130575	14-107130575	t	c	0.965702	0.8673	NA	NA	NA	0.8673
within10KBIGHV1-67	14	107130673	14-107130673	a	g	0.943461	0.8982	NA	NA	NA	0.8982
within10KBIGHV1-67	14	107130679	14-107130679	a	g	1.05982	0.8983	NA	NA	NA	0.8983
within10KBIGHV1-67	14	107130708	14-107130708	c	g	1.21872	0.5759	NA	NA	NA	0.5759
within10KBIGHV1-67	14	107130739	14-107130739	a	g	0.998901	0.9939	NA	NA	NA	0.9939
within10KBIGHV1-67	14	107130759	14-107130759	t	c	1.00753	0.9534	NA	NA	NA	0.9534
within10KBIGHV1-67	14	107130773	14-107130773	t	c	1.10407	0.5395	NA	NA	NA	0.5395
within10KBIGHV1-67	14	107130780	14-107130780	a	g	1.39934	0.1927	NA	NA	NA	0.1927
within10KBIGHV1-67	14	107130909	14-107130909	t	c	1.02337	0.8746	NA	NA	NA	0.8746
within10KBIGHV1-67	14	107130943	rs1964193	a	g	1.02942	0.3131	NA	NA	NA	0.3131
within10KBIGHV1-67	14	107130971	rs4436694	t	c	0.981376	0.4126	NA	NA	NA	0.4126
within10KBIGHV1-67	14	107131063	rs2583286	a	g	0.966185	0.3184	NA	NA	NA	0.3184
within10KBIGHV1-67	14	107131089	14-107131089	a	g	0.976872	0.8698	NA	NA	NA	0.8698
within10KBIGHV1-67	14	107131128	rs10143945	t	g	1.01816	0.603	NA	NA	NA	0.603
within10KBIGHV1-67	14	107131164	rs6423677	a	c	1.0018	0.9374	NA	NA	NA	0.9374
within10KBIGHV1-67	14	107131246	rs7146064	t	c	1.0016	0.9319	NA	NA	NA	0.9319
within10KBIGHV1-67	14	107131290	rs11623191	t	c	0.991437	0.6743	NA	NA	NA	0.6743
within10KBIGHV1-67	14	107131300	rs7147390	t	c	0.993223	0.739	NA	NA	NA	0.739
within10KBIGHV1-67	14	107131357	rs11623082	t	c	0.996805	0.8664	NA	NA	NA	0.8664
within10KBIGHV1-67	14	107131375	14-107131375	t	c	1.05327	0.05341	NA	NA	NA	0.05341
within10KBIGHV1-67	14	107131394	rs11627259	a	g	1.00351	0.8551	NA	NA	NA	0.8551
within10KBIGHV1-67	14	107131410	rs11627183	a	g	0.997802	0.9074	NA	NA	NA	0.9074
within10KBIGHV1-67	14	107131572	14-107131572	a	g	0.984127	0.8501	NA	NA	NA	0.8501
within10KBIGHV1-67	14	107131623	14-107131623	t	c	1.01349	0.9045	NA	NA	NA	0.9045
within10KBIGHV1-67	14	107131709	14-107131709	t	c	1.00965	0.9542	NA	NA	NA	0.9542
within10KBIGHV1-67	14	107131839	rs11627342	a	g	0.962328	0.05088	NA	NA	NA	0.05088
within10KBIGHV1-67	14	107132193	rs2006283	t	c	0.778801	0.002683	NA	NA	NA	0.002683
within10KBIGHV1-67	14	107132201	rs2006284	a	g	1.00401	0.8245	NA	NA	NA	0.8245
within10KBIGHV1-67	14	107132247	14-107132247	a	g	0.874678	0.01478	NA	NA	NA	0.01478
within10KBIGHV1-67	14	107132269	14-107132269	a	c	1.14282	0.01545	NA	NA	NA	0.01545
within10KBIGHV1-67	14	107132575	rs17095456	t	c	0.92367	0.002239	NA	NA	NA	0.002239
within10KBIGHV1-67	14	107132641	rs9324091	t	c	1.03956	0.05186	NA	NA	NA	0.05186
within10KBIGHV1-67	14	107133010	14-107133010	t	c	0.971514	0.8722	NA	NA	NA	0.8722
within10KBIGHV1-67	14	107133037	14-107133037	t	c	1.28351	0.002536	NA	NA	NA	0.002536
within10KBIGHV1-67	14	107133196	rs10150460	c	g	1.00702	0.7003	NA	NA	NA	0.7003
within10KBIGHV1-67	14	107133431	rs57865714	t	c	1.07262	0.01286	NA	NA	NA	0.01286
within10KBIGHV1-67	14	107133702	rs2956491	a	g	0.6398	0.02369	NA	NA	NA	0.02369
within10KBIGHV1-67	14	107133791	rs7142279	c	g	1.00491	0.7784	NA	NA	NA	0.7784
within10KBIGHV1-67	14	107133928	rs61997604	t	c	0.963194	0.05175	NA	NA	NA	0.05175
within10KBIGHV1-67	14	107134290	rs17113249	a	g	0.99551	0.7975	NA	NA	NA	0.7975
within10KBIGHV1-67	14	107134385	rs61997605	a	t	1.03821	0.05178	NA	NA	NA	0.05178
within10KBIGHV1-67	14	107134759	rs8010605	t	c	1.04394	0.0316	NA	NA	NA	0.0316
within10KBIGHV1-67	14	107134871	rs8012033	a	t	1.03852	0.05095	NA	NA	NA	0.05095
within10KBIGHV1-67	14	107134913	rs8011090	a	g	1.03821	0.05279	NA	NA	NA	0.05279
within10KBIGHV1-67	14	107135102	14-107135102	a	t	1.07595	0.8382	NA	NA	NA	0.8382
within10KBIGHV1-67	14	107135591	rs17113257	t	c	1.07918	0.00281	NA	NA	NA	0.00281
within10KBIGHV1-67	14	107135717	rs756584	t	c	0.900955	0.2302	NA	NA	NA	0.2302
within10KBIGHV1-67	14	107136019	rs756583	t	c	0.994217	0.7411	NA	NA	NA	0.7411
within10KBIGHV1-67	14	107136341	14-107136341	a	g	1.04196	0.03416	NA	NA	NA	0.03416
IGHV1-67	14	107136848	rs2011167	A	G	1.08188	0.002229	1.23804	0.00128642	1.1012	5.761e-05
IGHV1-67	14	107136873	rs1961901	T	G	0.924317	0.002232	0.813517	0.00176278	0.908646	6.31e-05
within10KBIGHV1-67	14	107137063	rs2516864	a	g	0.953515	0.3992	NA	NA	NA	0.3992
within10KBIGHV1-67	14	107137290	rs4774008	a	t	0.994615	0.7536	NA	NA	NA	0.7536
within10KBIGHV1-67	14	107137337	rs4774172	t	c	0.925242	0.002296	NA	NA	NA	0.002296
within10KBIGHV1-67	14	107137412	rs2583285	a	g	1.00511	0.8791	NA	NA	NA	0.8791
within10KBIGHV1-67	14	107137434	rs17113272	t	c	1.27839	0.001758	NA	NA	NA	0.001758
within10KBIGHV1-67	14	107137831	rs10143242	t	c	1.00753	0.663	NA	NA	NA	0.663
within10KBIGHV1-67	14	107138039	rs2105991	c	g	0.994515	0.748	NA	NA	NA	0.748
within10KBIGHV1-67	14	107138046	rs4774173	t	c	0.920627	0.00203	NA	NA	NA	0.00203
within10KBIGHV1-67	14	107138216	rs2105989	t	c	1.00562	0.7427	NA	NA	NA	0.7427
within10KBIGHV1-67	14	107138236	14-107138236	a	g	0.7736	0.001629	NA	NA	NA	0.001629
within10KBIGHV1-67	14	107138303	rs3944157	t	c	0.994217	0.7355	NA	NA	NA	0.7355
within10KBIGHV1-67	14	107138799	14-107138799	t	c	1.21799	0.1198	NA	NA	NA	0.1198
within10KBIGHV1-67	14	107138889	14-107138889	a	g	0.532805	0.2144	NA	NA	NA	0.2144
within10KBIGHV1-67	14	107138990	14-107138990	t	c	0.898975	0.4919	NA	NA	NA	0.4919
within10KBIGHV1-67	14	107139502	rs17113276	t	c	1.07778	0.002787	NA	NA	NA	0.002787
within10KBIGHV1-67	14	107139583	rs17113281	t	c	0.804689	0.002761	NA	NA	NA	0.002761
within10KBIGHV1-67	14	107139699	14-107139699	a	c	0.981081	0.909	NA	NA	NA	0.909
within10KBIGHV1-67	14	107139713	rs6576201	a	g	0.99551	0.7891	NA	NA	NA	0.7891
within10KBIGHV1-67	14	107139823	rs9324092	t	c	1.00461	0.7931	NA	NA	NA	0.7931
within10KBIGHV1-67	14	107139868	rs11845269	a	g	0.925057	0.003014	NA	NA	NA	0.003014
within10KBIGHV1-67	14	107139910	rs9324093	t	c	1.003	0.8663	NA	NA	NA	0.8663
within10KBIGHV1-67	14	107140493	rs17113284	t	c	0.963194	0.04485	NA	NA	NA	0.04485
within10KBIGHV1-67	14	107141122	rs1024350	t	c	1.00461	0.7888	NA	NA	NA	0.7888
within10KBIGHV1-67	14	107141367	14-107141367	a	g	1.11182	0.4938	NA	NA	NA	0.4938
within10KBIGHV1-67	14	107141511	rs58593591	a	g	0.784115	0.001549	NA	NA	NA	0.001549
within10KBIGHV1-67	14	107141916	rs10139058	t	c	0.995212	0.7771	NA	NA	NA	0.7771
within10KBIGHV1-67	14	107142166	rs1974468	a	g	0.99362	0.7018	NA	NA	NA	0.7018
within10KBIGHV1-67	14	107142326	14-107142326	t	g	1.08741	0.001221	NA	NA	NA	0.001221
within10KBIGHV1-67	14	107142378	rs8004835	a	c	1.00481	0.7779	NA	NA	NA	0.7779
within10KBIGHV1-67	14	107142448	rs8005468	a	g	1.03956	0.03796	NA	NA	NA	0.03796
within10KBIGHV1-67	14	107142564	14-107142564	t	c	1.2581	0.005559	NA	NA	NA	0.005559
within10KBIGHV1-67	14	107142580	14-107142580	t	c	0.754877	0.001993	NA	NA	NA	0.001993
within10KBIGHV1-67	14	107142790	rs17112416	t	g	0.920443	0.001269	NA	NA	NA	0.001269
within10KBIGHV1-67	14	107143294	rs7143784	a	g	0.994316	0.7317	NA	NA	NA	0.7317
within10KBIGHV1-67	14	107143461	rs2097580	t	c	1.00481	0.7769	NA	NA	NA	0.7769
within10KBIGHV1-67	14	107143564	14-107143564	t	c	0.898885	0.2811	NA	NA	NA	0.2811
within10KBIGHV1-67	14	107144078	rs3858878	a	g	0.929043	0.003223	NA	NA	NA	0.003223
within10KBIGHV1-67	14	107144105	14-107144105	t	c	1.27634	0.001713	NA	NA	NA	0.001713
within10KBIGHV1-67	14	107144126	rs10145772	t	c	1.27634	0.001718	NA	NA	NA	0.001718
within10KBIGHV1-67	14	107144219	14-107144219	a	c	1.01664	0.9507	NA	NA	NA	0.9507
within10KBIGHV1-67	14	107144984	rs11851094	t	c	0.926631	0.003019	NA	NA	NA	0.003019
within10KBIGHV1-67	14	107145272	rs10459466	a	c	1.07702	0.002871	NA	NA	NA	0.002871
within10KBIGHV1-67	14	107146014	rs1024349	a	g	1.03759	0.04774	NA	NA	NA	0.04774
within10KBIGHV1-67	14	107146628	14-107146628	a	c	1.27265	0.002036	NA	NA	NA	0.002036
within10KBIGHV1-67	14	107146692	rs2013423	t	c	1.03852	0.04929	NA	NA	NA	0.04929
within10KBIGHV1-67	14	107146998	rs10132367	t	c	1.03821	0.04565	NA	NA	NA	0.04565
