# Supplementary material for: Gene-Wide Analysis Detects Two New Susceptibility Genes for Alzheimer's Disease
Source: PLoS One. 2014 Jun 12;9(6):e94661. doi: 10.1371/journal.pone.0094661 (PMC4055488; doi:10.1371/journal.pone.0094661)
Supplement: Table S5 — Detailed SNP information for ZNF3 gene. (XLS) [file pone.0094661.s005.xls]

## Sheet: SupplTable5
Table S5. Detailed SNP information for ZNF3 gene.
GENE	chr	pos	SNP	Allele1	Allele2	OR Stage1	P.value Stage1	OR Stage2	P.value Stage2	OR comb	P.value comb
ZCWPW1	7	100004446	rs1476679	C	T	0.924687	7.402e-06	0.894134	9.687e-06	0.914754	5.576e-10
within10kbZNF3	7	99652922	rs7780686	c	g	0.992131	0.6383	NA	NA	NA	0.6383
within10kbZNF3	7	99654600	rs11558475	a	g	0.99233	0.6483	NA	NA	NA	0.6483
within10kbZNF3	7	99654689	rs11558476	a	g	1.00501	0.7677	NA	NA	NA	0.7677
within10kbZNF3	7	99656563	7-99656563	c	g	1.03717	0.7266	NA	NA	NA	0.7266
within10kbZNF3	7	99656927	rs12705070	G	A	0.940071	0.0003306	0.910647	0.0002664	0.93081	5.376e-07
within10kbZNF3	7	99657919	7-99657919	a	g	0.762922	0.5421	NA	NA	NA	0.5421
within10kbZNF3	7	99659722	7-99659722	a	g	1.21264	0.3182	NA	NA	NA	0.3182
within10kbZNF3	7	99660074	7-99660074	t	c	1.00743	0.9595	NA	NA	NA	0.9595
within10kbZNF3	7	99660148	rs4421299	a	g	1.00813	0.6424	NA	NA	NA	0.6424
ZNF3	7	99663370	7-99663370	a	g	0.981572	0.6109	NA	NA	NA	0.6109
ZNF3	7	99663516	rs12532238	a	g	0.992528	0.6583	NA	NA	NA	0.6583
ZNF3	7	99664817	rs7778571	a	g	0.948285	0.00275	NA	NA	NA	0.00275
ZNF3	7	99665156	7-99665156	t	c	0.982751	0.6333	NA	NA	NA	0.6333
ZNF3	7	99665798	rs4729573	t	c	1.01704	0.3516	NA	NA	NA	0.3516
ZNF3	7	99665834	rs6950205	t	c	0.937911	0.000247	NA	NA	NA	0.000247
ZNF3	7	99666620	rs4272301	a	t	1.00612	0.9481	NA	NA	NA	0.9481
ZNF3	7	99666641	rs4308665	c	g	1.00833	0.6251	NA	NA	NA	0.6251
ZNF3	7	99668107	rs6592	t	g	1.0016	0.9261	NA	NA	NA	0.9261
ZNF3	7	99669802	rs11550034	a	g	0.988862	0.6162	NA	NA	NA	0.6162
ZNF3	7	99670105	7-99670105	t	g	1.00823	0.6249	NA	NA	NA	0.6249
ZNF3	7	99670328	rs12673441	a	t	0.994913	0.7766	NA	NA	NA	0.7766
ZNF3	7	99670875	rs6960432	c	g	0.951896	0.001718	NA	NA	NA	0.001718
ZNF3	7	99670932	rs13232115	C	T	0.937255	0.0002684	0.912014	0.0004205	0.929136	5.822e-07
ZNF3	7	99672545	7-99672545	t	c	1.02737	0.4946	NA	NA	NA	0.4946
ZNF3	7	99673359	rs56054049	a	c	0.991933	0.6302	NA	NA	NA	0.6302
ZNF3	7	99674286	7-99674286	a	g	1.00481	0.7875	NA	NA	NA	0.7875
ZNF3	7	99674555	7-99674555	a	g	0.889052	0.01804	NA	NA	NA	0.01804
ZNF3	7	99674870	rs34312198	a	c	1.06663	0.01156	NA	NA	NA	0.01156
ZNF3	7	99675558	rs13236456	a	g	1.04655	0.003335	NA	NA	NA	0.003335
ZNF3	7	99675659	rs13223792	t	g	1.05601	0.002265	NA	NA	NA	0.002265
ZNF3	7	99676346	rs62485010	t	c	1.01106	0.5762	NA	NA	NA	0.5762
ZNF3	7	99677917	rs34031156	A	T	0.937067	0.00022	0.910192	0.0002501	0.928393	3.098e-07
ZNF3	7	99678491	rs941289	a	g	0.991239	0.6004	NA	NA	NA	0.6004
ZNF3	7	99678622	rs941290	a	c	1.01167	0.5565	NA	NA	NA	0.5565
ZNF3	7	99678946	7-99678946	a	t	0.991734	0.7639	NA	NA	NA	0.7639
ZNF3	7	99679295	7-99679295	t	c	1.08676	0.03208	NA	NA	NA	0.03208
within10kbZNF3	7	99682026	rs12705071	t	c	1.05855	0.001531	NA	NA	NA	0.001531
within10kbZNF3	7	99684115	7-99684115	t	c	1.1572	0.4253	NA	NA	NA	0.4253
within10kbZNF3	7	99684271	rs56252897	a	c	0.996207	0.9101	NA	NA	NA	0.9101
within10kbZNF3	7	99684526	7-99684526	a	g	1.00733	0.8538	NA	NA	NA	0.8538
within10kbZNF3	7	99685309	7-99685309	t	c	1.00622	0.8695	NA	NA	NA	0.8695
within10kbZNF3	7	99686116	rs7807156	a	g	0.955711	0.003315	NA	NA	NA	0.003315
within10kbZNF3	7	99686873	rs4729575	t	g	1.00602	0.7358	NA	NA	NA	0.7358
within10kbZNF3	7	99687969	7-99687969	t	c	0.985703	0.6931	NA	NA	NA	0.6931
within10kbZNF3	7	99688822	rs2272346	a	c	0.987084	0.721	NA	NA	NA	0.721
