# Supplementary material for: Gene-Wide Analysis Detects Two New Susceptibility Genes for Alzheimer's Disease
Source: PLoS One. 2014 Jun 12;9(6):e94661. doi: 10.1371/journal.pone.0094661 (PMC4055488; doi:10.1371/journal.pone.0094661)
Supplement: Table S6 — Detailed SNP information for NDUFS3 gene. (XLS) [file pone.0094661.s006.xls]

## Sheet: SupplTable6
Table S6. Detailed SNP information for NDUFS3 gene.
GENE	chr	pos	SNP	Allele1	Allele2	OR Stage1	P.value Stage1	OR Stage2	P.value Stage2	OR comb	P.value comb
CELF1	11	47557871	rs10838725	C	T	1.07821	6.729e-06	1.09024	0.0004075	1.0821	1.116e-08	reported in IGAP paper
within10kbNDUFS3	11	47591661	11-47591661	t	g	1.03977	0.2379	NA	NA	NA	0.2379
within10kbNDUFS3	11	47594369	11-47594369	t	g	1.11516	0.7375	NA	NA	NA	0.7375
within10kbNDUFS3	11	47597601	rs6485760	c	g	0.924964	0.8088	NA	NA	NA	0.8088
within10kbNDUFS3	11	47598361	11-47598361	a	t	1.19137	0.08898	NA	NA	NA	0.08898
within10kbNDUFS3	11	47598481	11-47598481	a	g	1.10263	0.2307	NA	NA	NA	0.2307
within10kbNDUFS3	11	47600438	rs2280231	T	C	1.07799	1.838e-05	1.06876	0.007545	1.07487	4.637e-07
NDUFS3	11	47602879	11-47602879	G	A	1.0006	0.9775	NA	NA	NA	NA
NDUFS3	11	47603006	rs71475924	T	C	1.13247	1.44e-06	1.04383	0.1878	1.09735	4.333e-06
NDUFS3	11	47604104	11-47604104	a	g	1.06258	0.8957	NA	NA	NA	0.8957
NDUFS3	11	47604639	rs12798028	T	C	0.939601	7.71e-05	0.943367	0.01203	0.940729	2.851e-06
NDUFS3	11	47605427	rs4147730	G	A	1.00321	0.8899	NA	NA	NA	NA
within10kbNDUFS3	11	47606306	rs7109918	a	c	0.882762	0.2307	NA	NA	NA	0.2307
within10kbNDUFS3	11	47606483	rs11605348	a	g	0.926816	4.419e-06	NA	NA	NA	4.419e-06
within10kbNDUFS3	11	47606865	rs12287076	c	g	0.928207	1.266e-05	NA	NA	NA	1.266e-05
within10kbNDUFS3	11	47606984	rs10742816	t	c	0.997403	0.9159	NA	NA	NA	0.9159
within10kbNDUFS3	11	47607135	rs10838731	t	c	1.07272	2.228e-05	NA	NA	NA	2.228e-05
within10kbNDUFS3	11	47607912	11-47607912	t	c	0.982259	0.5208	NA	NA	NA	0.5208
within10kbNDUFS3	11	47607940	rs10838732	c	g	0.939977	6.883e-05	NA	NA	NA	6.883e-05
within10kbNDUFS3	11	47608949	rs36016346	a	t	1.03998	0.2355	NA	NA	NA	0.2355
within10kbNDUFS3	11	47609061	rs56836683	t	c	0.829942	0.646	NA	NA	NA	0.646
within10kbNDUFS3	11	47610569	11-47610569	c	g	0.779502	0.5333	NA	NA	NA	0.5333
within10kbNDUFS3	11	47611152	rs11039307	T	C	0.93763	4.588e-05	0.953038	0.06671	0.941765	9.103e-06
within10kbNDUFS3	11	47611940	11-47611940	c	g	1.04844	0.8659	NA	NA	NA	0.8659
