# Supplementary material for: Gene-Wide Analysis Detects Two New Susceptibility Genes for Alzheimer's Disease
Source: PLoS One. 2014 Jun 12;9(6):e94661. doi: 10.1371/journal.pone.0094661 (PMC4055488; doi:10.1371/journal.pone.0094661)
Supplement: Table S7 — Detailed SNP information for MTCH2 gene. (XLS) [file pone.0094661.s007.xls]

## Sheet: SupplTable7
Table S7. Detailed SNP information for MTCH2 gene.
GENE	chr	pos	SNP	Allele1	Allele2	OR Stage1	P.value Stage1	OR Stage2	P.value Stage2	OR comb	P.value comb
CELF1	11	47557871	rs10838725	C	T	1.07821	6.729e-06	1.09024	0.0004075	1.0821	1.116e-08	reported in IGAP paper
within10kbMTCH2	11	47629793	rs2138767	t	c	0.997004	0.9028	NA	NA	NA	0.9028
within10kbMTCH2	11	47632212	rs60133324	a	g	0.982063	0.9019	NA	NA	NA	0.9019
within10kbMTCH2	11	47632707	rs1474056	a	g	1.0015	0.9491	NA	NA	NA	0.9491
within10kbMTCH2	11	47633018	11-47633018	a	t	1.00552	0.8174	NA	NA	NA	0.8174
within10kbMTCH2	11	47633506	rs7931089	a	g	1.002	0.9302	NA	NA	NA	0.9302
within10kbMTCH2	11	47634413	rs11601083	a	t	1.03231	0.3343	NA	NA	NA	0.3343
within10kbMTCH2	11	47637815	11-47637815	t	c	1.0019	0.9776	NA	NA	NA	0.9776
within10kbMTCH2	11	47638453	11-47638453	t	c	0.979611	0.9321	NA	NA	NA	0.9321
MTCH2	11	47639063	rs9089	a	g	1.03015	0.3749	1.0737	0.480298	1.03438	0.2869
MTCH2	11	47639525	rs4623856	t	g	1.06492	0.3832	0.858095	0.716202	1.05834	0.4255
MTCH2	11	47640201	11-47640201	a	g	1.03252	0.3312	1.07234	0.487539	1.03624	0.2544
MTCH2	11	47640337	11-47640337	t	c	1.06364	0.3079	NA	NA	NA	0.3079
MTCH2	11	47640355	11-47640355	t	c	0.919339	0.2439	NA	NA	NA	0.2439
MTCH2	11	47640398	11-47640398	t	c	1.01542	0.6212	NA	NA	NA	0.6212
MTCH2	11	47640661	rs55656834	t	c	0.92728	0.4281	NA	NA	NA	0.4281
MTCH2	11	47640762	11-47640762	t	c	1.05887	0.2346	1.15562	0.258538	1.07037	0.1307
MTCH2	11	47640891	rs7116299	t	c	1.01025	0.6964	NA	NA	NA	0.6964
MTCH2	11	47641175	rs10838735	t	c	1.0002	0.998	NA	NA	NA	0.998
MTCH2	11	47641747	11-47641747	a	g	1.41595	0.01223	NA	NA	NA	0.01223
MTCH2	11	47643891	rs3817335	a	t	0.930531	1.013e-05	NA	NA	NA	1.013e-05
MTCH2	11	47644289	11-47644289	a	c	1.0284	0.3784	NA	NA	NA	0.3784
MTCH2	11	47645367	11-47645367	a	g	1.4598	0.4377	NA	NA	NA	0.4377
MTCH2	11	47647238	11-47647238	a	g	0.982259	0.6423	NA	NA	NA	0.6423
MTCH2	11	47647265	11-47647265	a	g	1.014	0.6722	NA	NA	NA	0.6722
MTCH2	11	47648042	rs4752856	A	G	0.927002	6.817e-06	0.94365	0.01577	0.932487	3.978e-07
MTCH2	11	47650993	rs3817334	T	C	0.940259	9.288e-05	0.944311	0.01341	0.941576	3.791e-06
MTCH2	11	47652476	11-47652476	T	A	1.15928	0.0007512	1.11316	0.04443	1.14042	0.0001046
MTCH2	11	47653242	11-47653242	a	g	1.03842	0.6443	NA	NA	NA	0.6443
MTCH2	11	47653711	rs11600974	t	c	1.03169	0.3567	1.04094	0.692996	NA	0.592665
MTCH2	11	47655380	rs7945312	T	C	1.06301	9.535e-05	1.043	0.08697	1.05717	2.547e-05
MTCH2	11	47655752	rs4752857	t	c	0.929973	8.464e-06	1.04707	0.61112	0.933513	1.775e-05
MTCH2	11	47658314	rs12794570	T	C	0.930996	1.164e-05	0.943367	0.01649	0.934821	6.459e-07
MTCH2	11	47659135	rs7118178	A	G	1.06801	0.0001017	1.06759	0.008614	1.06791	2.717e-06
MTCH2	11	47660001	rs10838736	t	g	1.06663	3.747e-05	NA	NA	NA	3.747e-05
MTCH2	11	47660287	11-47660287	t	c	1.07165	0.456	NA	NA	NA	0.456
MTCH2	11	47661498	rs7129948	a	c	1.0018	0.936	0.855042	0.0152876	NA	0.936
MTCH2	11	47662589	rs11039322	t	c	1.0017	0.9382	NA	NA	NA	0.9382
MTCH2	11	47662932	rs7120548	C	T	1.07466	2.286e-05	1.0847	0.0008332	1.07788	7.225e-08
MTCH2	11	47663001	11-47663001	a	g	0.962906	0.6486	0.86292	0.614777	0.955042	0.565
MTCH2	11	47663049	rs10838738	G	A	0.93081	1.025e-05	0.941294	0.01186	0.934074	4.101e-07
MTCH2	11	47663986	11-47663986	t	c	1.0009	0.9833	NA	NA	NA	0.9833
MTCH2	11	47663996	11-47663996	t	c	0.9999	0.9977	NA	NA	NA	0.9977
within10kbMTCH2	11	47665622	11-47665622	a	g	0.915212	0.7449	NA	NA	NA	0.7449
within10kbMTCH2	11	47665686	rs11039324	a	g	0.936974	5.885e-05	NA	NA	NA	5.885e-05
within10kbMTCH2	11	47667167	rs7129797	c	g	1.06588	3.855e-05	NA	NA	NA	3.855e-05
within10kbMTCH2	11	47669074	rs61897973	G	A	1.09626	7.827e-05	1.03458	0.2945	1.07487	0.000134
within10kbMTCH2	11	47669175	rs59360790	C	T	0.940259	9.295e-05	0.949139	0.02451	0.94299	6.9e-06
within10kbMTCH2	11	47669249	rs7107792	C	A	1.06258	8.863e-05	1.03396	0.1422	1.05348	4.789e-05
within10kbMTCH2	11	47669619	rs12419507	a	g	0.940729	0.0001072	NA	NA	NA	0.0001072
within10kbMTCH2	11	47669665	rs12787646	t	c	1.07423	1.428e-05	NA	NA	NA	1.428e-05
within10kbMTCH2	11	47669861	11-47669861	a	g	0.929415	0.0002322	NA	NA	NA	0.0002322
within10kbMTCH2	11	47670056	rs11039325	t	c	0.879677	0.2349	NA	NA	NA	0.2349
within10kbMTCH2	11	47672587	11-47672587	a	g	1.02337	0.4712	NA	NA	NA	0.4712
within10kbMTCH2	11	47672605	rs7945911	a	g	0.9998	0.9918	NA	NA	NA	0.9918
within10kbMTCH2	11	47672743	rs10838739	T	C	1.06599	7.054e-05	1.03521	0.1287	1.05559	3.745e-05
within10kbMTCH2	11	47673300	11-47673300	t	c	1.01369	0.7891	NA	NA	NA	0.7891
within10kbMTCH2	11	47673470	rs61897975	a	t	1.2338	0.1301	NA	NA	NA	0.1301
within10kbMTCH2	11	47674084	rs11039327	T	A	0.929973	8.988e-06	0.858301	0.006941	0.924317	5.31e-07
within10kbMTCH2	11	47674101	rs2869024	G	A	1.06226	9.987e-05	1.03572	0.1231	1.0538	4.437e-05
