# Supplementary material for: Gene-Wide Analysis Detects Two New Susceptibility Genes for Alzheimer's Disease
Source: PLoS One. 2014 Jun 12;9(6):e94661. doi: 10.1371/journal.pone.0094661 (PMC4055488; doi:10.1371/journal.pone.0094661)
Supplement: Table S11 — Brain Meth QTLs. (XLSX) [file pone.0094661.s011.xlsx]

## Sheet: SupplTable11
Table S11. Brain Meth QTLs
IndexSNP	meSNPid	Index to meSNP (r^2 CEU)	Tissue	PMID citation	SampleSize	meQTL.p	Methylation Probe	Best meSNP for this probe	r^2 (colA SNP to colG SNP)	r^2 (colB SNP to colG SNP)	MethProbe Chr	MethProbe Position	SNP-chr	SNP-position (hg18)	is_cis?	beta	r2	CorrectedP	Methylation Gene	SNP Gene
rs4735333	rs13257021	0.846	Temporal cortex	20485568	127	6.24e-13	cg18059933	rs13257021	0.846	Same SNP	8	96031639	8	96034871	cis	0.04812	0.3402	0.000999	TP53INP1	TP53INP1
rs4735333	rs7845219	0.967	Temporal cortex	20485568	127	2.47e-11	cg18059933	rs13257021	0.846	0.819	8	96031639	8	96006678	cis	-0.04471	0.3008	0.000999	TP53INP1	TP53INP1
rs4735333	rs896854	0.875	Temporal cortex	20485568	127	2.83e-11	cg18059933	rs13257021	0.846	0.967	8	96031639	8	96029687	cis	-0.04514	0.2993	0.000999	TP53INP1	TP53INP1
rs4735333	rs13255935	0.875	Temporal cortex	20485568	127	2.83e-11	cg18059933	rs13257021	0.846	0.967	8	96031639	8	96034861	cis	-0.04514	0.2993	0.000999	TP53INP1	TP53INP1
rs4735333	rs13257021	0.846	Frontal cortex	20485568	133	3.75e-10	cg18059933	rs13257021	0.846	Same SNP	8	96031639	8	96034871	cis	0.04548	0.2597	0.000999	TP53INP1	TP53INP1
rs4735333	rs896854	0.875	Frontal cortex	20485568	133	2.51e-08	cg18059933	rs13257021	0.846	0.967	8	96031639	8	96029687	cis	-0.04107	0.2117	0.01099	TP53INP1	TP53INP1
rs4735333	rs13255935	0.875	Frontal cortex	20485568	133	2.51e-08	cg18059933	rs13257021	0.846	0.967	8	96031639	8	96034861	cis	-0.04107	0.2117	0.01099	TP53INP1	TP53INP1
rs4735333	rs12548874	0.817	Temporal cortex	20485568	127	4.27e-08	cg18059933	rs13257021	0.846	0.691	8	96031639	8	96004340	cis	-0.03785	0.2143	0.02198	TP53INP1	TP53INP1
rs1713669	rs1713669	Same SNP	Temporal cortex	20485568	127	1.38e-08	cg18059933	rs13257021	0.764	0.764	8	96031639	8	96027813	cis	0.03989	0.2279	0.00999	TP53INP1	TP53INP1
rs1713669	rs527234	1	Temporal cortex	20485568	127	1.38e-08	cg18059933	rs13257021	0.764	0.764	8	96031639	8	96032974	cis	0.03989	0.2279	0.00999	TP53INP1	TP53INP1
rs1713669	rs2515226	1	Temporal cortex	20485568	127	1.38e-08	cg18059933	rs13257021	0.764	0.764	8	96031639	8	96034919	cis	0.03989	0.2279	0.00999	TP53INP1	TP53INP1
rs1713669	rs509594	1	Temporal cortex	20485568	127	1.38e-08	cg18059933	rs13257021	0.764	0.764	8	96031639	8	96036332	cis	0.03989	0.2279	0.00999	TP53INP1	TP53INP1
rs1713669	rs481887	1	Temporal cortex	20485568	127	1.38e-08	cg18059933	rs13257021	0.764	0.764	8	96031639	8	96037014	cis	0.03989	0.2279	0.00999	TP53INP1	TP53INP1
